# Supplementary material
Source: publisher figshare collection journal article supplement (https://karger.figshare.com/articles/dataset/_/5126374)
Supplement: Supplementary file 1 [file 1]

## Supplementary Table 2

**Summary of patients' variants:** The table lists all variants that passed filters as described in Methods. Variant location, reference and variant alleles are reported from hg19 coordinates. Minor allele frequency is based on the overall allele frequency in the NHLBI Exome Variant Server (ESP 6500 release) (NHLBI GO exome variant server). Functional effect was assessed with PolyPhen2 prediction tool, which estimates the effect of missense variants (Adzhubei, 2010). A score of 0.00 is least likely to perturb protein function, while a score of 1.00 indicates a missense variant that is mostly likely to perturb protein function. Functional annotation of SNPs was assessed using SnpEff 2.0.5 (Cingolani, 2012) and validated manually. Protein function was summarized using information found in the UniProt database. Online Mendelian Inheritance of Man (OMIM) database was used to identify any known disease associations. Variants highlighted in yellow are pathogenic variants that we have determined cause short stature. These causal variants are also shown in Table 3.

Patient 01

| Gene                    | Inheritance Pattern         | Position (hg19)                      | Reference | Variant | Frequency (Exome Variant Server) | dbSNP ID (if available) | Functional Annotation (SnPEff) | Amino Acid change  | PolyPhen2      | Prediction                             | Function (UniProt)                            | Associated Diseases (OMIM)                                                        |
|-------------------------|-----------------------------|--------------------------------------|-----------|---------|----------------------------------|-------------------------|--------------------------------|--------------------|----------------|----------------------------------------|-----------------------------------------------|-----------------------------------------------------------------------------------|
| <i>KIAA1609 (TLDC1)</i> | Compound Heterozygous       | Chr 16: 84516214<br>Chr 16: 84520260 | G<br>C    | A<br>T  | 0.003385<br>NA                   | rs140439420<br>NA       | missense<br>Nonsense           | T354M<br>W312*     | 1.000<br>NA    | probably damaging<br>NA                | unknown                                       | None                                                                              |
| <i>LTBP4</i>            | Compound Heterozygous       | Chr 19: 41114407<br>Chr 19: 41132912 | C<br>C    | T<br>T  | 0.000922<br>0.000326             | NA<br>NA                | missense<br>missense           | R509C<br>P1407S    | 1.000<br>1.000 | probably damaging<br>probably damaging | regulating TGFβ1                              | Autosomal recessive cutis laxa, type IC                                           |
| <i>TTN</i>              | Compound Heterozygous       | Chr 2:179483341<br>Chr 2: 179437928  | C<br>T    | T<br>C  | NA<br>0.00372                    | NA<br>rs56201325        | missense<br>missense           | A14005T<br>T22670A | 0.989<br>0.000 | probably damaging<br>benign            | component of striated muscle sarcomere        | various muscular dystrophies and cardiomyopathies                                 |
| <i>PELI3</i>            | Compound Heterozygous       | Chr 11: 66243148<br>Chr 11: 66235631 | C<br>C    | T<br>T  | 0.00362<br>0.000154              | rs145732233<br>NA       | missense<br>missense           | A307V<br>S11F      | 0.769<br>0.191 | possibly damaging<br>benign            | E3 ubiquitin ligase                           | None                                                                              |
| <i>ZBED4</i>            | <i>de novo</i> heterozygous | Chr 22: 50277312                     | T         | C       | NA                               | NA                      | Start codon lost               | M1T                | 0.842          | possibly damaging                      | unknown                                       | None                                                                              |
| <i>KCNT1</i>            | Autosomal recessive         | Chr 9:138670668                      | G         | A       | 0.002153                         | rs151272083             | missense                       | R910Q              | 1.000          | probably damaging                      | T-type potassium channel                      | Nocturnal frontal lobe epilepsy-5; Early infantile epileptic encephalopathy-14    |
| <i>BTK</i>              | X-linked recessive          | Chr X: 100615717                     | C         | A       | 0.001609                         | rs35877704              | missense                       | E205D              | 0.084          | benign                                 | tyrosine kinase needed for B-cell development | X-linked agammaglobulinemia-1; Agammaglobulinemia and isolated hormone deficiency |
| <i>GPKOW</i>            | X-linked recessive          | Chr X: 48970674                      | C         | T       | NA                               | NA                      | missense                       | R439Q              | 0.604          | possibly damaging                      | unknown                                       | None                                                                              |
| <i>MAGEE2</i>           | X-linked recessive          | Chr X: 75004476                      | G         | C       | NA                               | NA                      | missense                       | D137E              | 0.008          | benign                                 | unknown                                       | None                                                                              |

Patient 02

| Gene           | Inheritance Pattern         | Position (hg19)                   | Reference | Variant | Frequency (Exome Variant Server) | dbSNP ID (if available) | Functional Annotation (SnpEff) | AA change             | PolyPhen2      | Prediction                             | Function (UniProt)                    | Associated Diseases (OMIM)                                 |
|----------------|-----------------------------|-----------------------------------|-----------|---------|----------------------------------|-------------------------|--------------------------------|-----------------------|----------------|----------------------------------------|---------------------------------------|------------------------------------------------------------|
| <b>B4GALT7</b> | Compound Heterozygous       | Chr 5: 177035995 Chr 5: 177031251 | C<br>T    | T<br>C  | NA<br>0.000077                   | rs28937869<br>NA        | missense<br>missense           | L41P<br>R270C         | 1<br>0.998     | probably damaging<br>probably damaging | Proteoglycan Synthesis                | Progeroid Type of Ehlers Danlos Syndrome                   |
| <i>GPR98</i>   | Compound Heterozygous       | Chr 5: 90059282 Chr 5: 89969880   | A<br>A    | G<br>G  | NA<br>0.004988                   | NA<br>rs72782753        | missense<br>missense           | D4094G<br>I1647V      | 0.166<br>0.001 | benign<br>benign                       | G-Protein coupled receptor in the CNS | Familial febrile seizures type 4, Usher's syndrome type 2C |
| <i>PYGB</i>    | Compound Heterozygous       | Chr 20: 25252069 Chr 20: 25260969 | G<br>G    | A<br>A  | NA<br>NA                         | NA<br>NA                | missense<br>missense           | G159R<br>R387H        | 1.000<br>1.000 | Probably damaging<br>Probably damaging | Glycogen Phosphorylase                | NA                                                         |
| <i>PPFIA1</i>  | <i>de novo</i> heterozygous | Chr 11: 70218665                  | C         | G       | NA                               | NA                      | missense                       | Q1042E                | 0.009          | benign                                 | Disassembly of focal adhesions        | NA                                                         |
| <i>ACE2</i>    | X-Linked                    | Chr X: 15607532                   | C         | T       | NA                               | rs148771870             | missense                       | G211R                 | 0.551          | Possibly Damaging                      | angiotensin I conversion              | NA                                                         |
| <i>BCORL1</i>  | X-Linked                    | Chr X: 129148489                  | G         | A       | NA                               | rs188957722             | missense                       | A581T                 | 0.056          | benign                                 | transcription co-repressor            | NA                                                         |
| <i>IL13RA2</i> | X-Linked                    | Chr X: 114239813                  | C         | G       | NA                               | NA                      | missense                       | V355L                 | 0.000          | benign                                 | Binds IL-13                           | NA                                                         |
| <i>VSIG1</i>   | X-Linked                    | Chr X: 107320521                  | G         | GGAGCCA | 0.003234                         | NA                      | codon insertion                | c.1182_1183 insGAGCCA | NA             | NA                                     | NA                                    | NA                                                         |

**Patient 03**

| Gene          | Inheritance Pattern            | Position (hg19)                      | Reference | Variant | Frequency<br>(Exome Variant<br>Server) | dbSNP ID (if available) | Functional<br>Annotation<br>(SnpEff) | Amino Acid<br>change | PolyPhen2      | Predition                   | Function (UniProt)                          | Associated Diseases (OMIM)                                      |
|---------------|--------------------------------|--------------------------------------|-----------|---------|----------------------------------------|-------------------------|--------------------------------------|----------------------|----------------|-----------------------------|---------------------------------------------|-----------------------------------------------------------------|
| <i>PCDH15</i> | Compound<br>Heterozygous       | Chr 10: 56129008<br>Chr 10: 55582676 | C<br>T    | T<br>C  | NA<br>NA                               | NA<br>NA                | missense<br>missense                 | V116M<br>R1604G      | 1.000<br>0.129 | probably damaging<br>benign | calcium-dependent cell-<br>adhesion protein | Usher syndrome Type 1D/F;<br>Autosomal recessive<br>deafness-23 |
| <i>IKZF4</i>  | <i>de novo</i><br>heterozygous | Chr 12: 56429081                     | C         | T       | NA                                     | NA                      | missense                             | S575F                | 0.856          | possibly damaging           | Transcriptional repressor                   | None                                                            |
| <i>PDXP</i>   | <i>de novo</i><br>heterozygous | Chr 22: 38061804                     | G         | A       | NA                                     | NA                      | missense                             | A273T                | 0.099          | benign                      | actin cytoskeleton<br>reorganization        | None                                                            |
| <i>PHF16</i>  | X-linked recessive             | Chr X: 46918243                      | T         | C       | NA                                     | rs35292182              | missense                             | F746L                | 0.000          | benign                      | histone acetyltransferase                   | None                                                            |

Patient 04

| Gene            | Inheritance Pattern            | Position (hg19)  | Reference | Variant | Frequency<br>(Exome Variant<br>Server) | dbSNP ID (if available) | Functional<br>Annotation<br>(SnpEff) | Amino Acid<br>change | PolyPhen2 | Prediction        | Function (UniProt)         | Associated Diseases (OMIM)    |
|-----------------|--------------------------------|------------------|-----------|---------|----------------------------------------|-------------------------|--------------------------------------|----------------------|-----------|-------------------|----------------------------|-------------------------------|
| <i>RNF123</i>   | Compound<br>Heterozygous       | Chr 3: 49742591  | G         | A       | 0.000308                               | NA                      | missense                             | V712M                | 0.776     | possibly damaging | E3 ubiquitin ligase        | none                          |
|                 |                                | Chr 3: 49739295  | C         | T       | NA                                     | NA                      | missense                             | R483W                | 1.000     | probably damaging |                            |                               |
| <i>BAZ2B</i>    | Compound<br>Heterozygous       | Chr 2: 160194190 | C         | T       | NA                                     | NA                      | missense                             | E1850K               | 0.366     | benign            | transcriptional regulation | none                          |
|                 |                                | Chr 2: 160252332 | C         | T       | 0.000421                               | rs180681997             | missense                             | R1008K               | 0.993     | probably damaging |                            |                               |
| <i>SH3TC1</i>   | Compound<br>Heterozygous       | Chr 4: 8229688   | C         | T       | NA                                     | NA                      | missense                             | P756L                | 0.036     | benign            | unknown                    | none                          |
|                 |                                | Chr 4: 8230053   | C         | T       | 0.008002                               | rs116515695             | missense                             | R878W                | 0.864     | possibly damaging |                            |                               |
|                 |                                | Chr 4: 8233750   | A         | G       | 0.007612                               | rs146877451             | missense                             | M1000V               | 0.001     | benign            |                            |                               |
| <i>LRRC6</i>    | <i>de novo</i><br>heterozygous | Chr 8: 133645029 | C         | T       | NA                                     | NA                      | missense                             | A204T                | 0.000     | benign            | dynein arms in cilia       | Primary ciliary dyskinesia-19 |
| <i>HSP90AB1</i> | <i>de novo</i><br>heterozygous | Chr 6: 44218299  | G         | C       | NA                                     | NA                      | missense                             | S307T                | 0.642     | possibly damaging | unknown                    | none                          |

**Patient 05**

| Gene   | Inheritance Pattern      | Position (hg19)  | Reference | Variant | Frequency<br>(Exome Variant<br>Server) | dbSNP ID (if available) | Functional<br>Annotation<br>(SnpEff) | Amino Acid<br>change | PolyPhen2 | Prediction        | Function (UniProt)                              | Associated Diseases (OMIM) |
|--------|--------------------------|------------------|-----------|---------|----------------------------------------|-------------------------|--------------------------------------|----------------------|-----------|-------------------|-------------------------------------------------|----------------------------|
| SV2C   | Compound<br>heterozygous | Chr 5: 75587140  | G         | A       | 0.002828                               | rs190593094             | missense                             | R411H                | 0.973     | probably damaging | secretion in neural and<br>endocrine cells from | none                       |
|        |                          | Chr 5: 75490776  | G         | T       | NA                                     | NA                      | missense                             | A205S                | 0.155     | benign            | secretory vesicles                              |                            |
| MMS19  | Compound<br>heterozygous | Chr 10: 99218996 | C         | T       | 0.003537                               | rs29001332              | missense                             | R983H                | 0.006     | benign            | generation of iron sulfur                       | none                       |
|        |                          | Chr 10: 99238117 | G         | A       | 0.002614                               | rs29001280              | missense                             | R98H                 | 1.000     | probably damaging | proteins                                        |                            |
| TAS2R9 | Compound<br>heterozygous | Chr 12: 10961777 | C         | T       | 0.002307                               | rs149844170             | missense                             | V300M                | 0.677     | possibly damaging | taste receptor                                  | none                       |
|        |                          | Chr 12: 10962022 | C         | T       | 0.009688                               | rs113883583             | missense                             | G218E                | 0.996     | possibly damaging |                                                 |                            |

Patient 06

| Gene    | Inheritance Pattern      | Position (hg19)   | Reference | Variant | Frequency<br>(Exome Variant<br>Server) | dbSNP ID (if available) | Functional<br>Annotation<br>(SnpEff) | Amino Acid<br>change | PolyPhen2 | Prediction        | Function (UniProt)               | Associated Diseases (OMIM) |
|---------|--------------------------|-------------------|-----------|---------|----------------------------------------|-------------------------|--------------------------------------|----------------------|-----------|-------------------|----------------------------------|----------------------------|
| ATM     | Compound<br>heterozygous | Chr 11: 108128246 | T         | A       | 0.000462                               | rs34231402              | missense                             | F763L                | 0.003     | benign            | DNA damage response              | Ataxia-telangiectasia      |
|         |                          | Chr 11: 108200949 | T         | C       | NA                                     | NA                      | missense                             | V2439A               | 0.196     | benign            |                                  |                            |
| AHNAK2  | Compound<br>heterozygous | Chr 14: 105415300 | A         | T       | NA                                     | NA                      | missense                             | F2163Y               | 0.995     | probably damaging | unknown                          | none                       |
|         |                          | Chr 14: 105415298 | C         | T       | NA                                     | NA                      | missense                             | G2164R               | 0.998     | probably damaging |                                  |                            |
|         |                          | Chr 14: 105415294 | A         | G       | 0.004123                               | NA                      | missense                             | V2165A               | 0.997     | probably damaging |                                  |                            |
| LRP1B   | Compound<br>heterozygous | Chr 2: 141291667  | C         | T       | NA                                     | NA                      | missense                             | R2562H               | 0.017     | benign            | receptor-mediated<br>endocytosis | none                       |
|         |                          | Chr 2: 141816515; | A         | T       | 0.000077                               | rs150873963             | missense                             | S449T                | 0.000     | benign            |                                  |                            |
| FAM129A | Autosomal<br>Recessive   | Chr 1:184853890   | T         | C       | 0.004075                               | rs140191774             | missense                             | K160E                | 0.997     | probably damaging | regulation of translation        | none                       |

Patient 07

| Gene            | Inheritance Pattern            | Position (hg19)                      | Reference | Variant | Frequency (Exome Variant Server) | dbSNP ID (if available)    | Functional Annotation (SnPEff) | Amino Acid change | PolyPhen2      | Prediction                             | Function (UniProt)                                 | Associated Diseases (OMIM) |
|-----------------|--------------------------------|--------------------------------------|-----------|---------|----------------------------------|----------------------------|--------------------------------|-------------------|----------------|----------------------------------------|----------------------------------------------------|----------------------------|
| <i>MYCBP2</i>   | Compound Heterozygous          | Chr 13: 77742618<br>Chr 13: 77751957 | T<br>T    | C<br>C  | 0.000461<br>0.001                | rs141717634<br>rs144627155 | missense<br>missense           | Y2020C<br>I1756V  | 0.999<br>0.000 | benign<br>benign                       | possible E3 ubiquitin ligase                       | None                       |
| <i>LRP1B</i>    | Compound Heterozygous          | Chr 2: 141986957<br>Chr 2: 141777554 | C<br>C    | A<br>T  | NA<br>0.0027                     | NA<br>rs77234491           | missense<br>missense           | E215D<br>R636Q    | 0.533<br>1.000 | possibly damaging<br>probably damaging | receptor mediated endocytosis                      | None                       |
| <i>PMFBP1</i>   | Compound Heterozygous          | Chr 16: 72154010<br>Chr 16: 72164475 | C<br>G    | T<br>T  | 0.0014<br>0.0005                 | rs72787072<br>rs140852275  | missense<br>missense           | R791H<br>Q532K    | 0.998<br>0.008 | probably damaging<br>benign            | organization of cell cytoskeleton                  | None                       |
| <i>C17ORF66</i> | Compound Heterozygous          | Chr 17: 34192351<br>Chr 17: 34191815 | G<br>G    | A<br>A  | 0.0018<br>0.0005                 | rs141724302<br>rs116191233 | missense<br>nonsense           | P63L              | 0.326          | benign                                 | unknown                                            | None                       |
| <i>KLHL26*</i>  | <i>de novo</i><br>heterozygous | Chr 19: 18778934                     | C         | T       | NA                               | NA                         | missense                       | R243C             | 0.018          | benign                                 | unknown                                            | None                       |
| <i>NUCB1</i>    | <i>de novo</i><br>heterozygous | Chr 19: 49416343                     | G         | A       | NA                               | NA                         | missense                       | E186K             | 1.000          | probably damaging                      | calcium binding in Golgi                           | None                       |
| <i>SRCAP</i>    | <i>de novo</i><br>heterozygous | Chr 16: 30748691                     | C         | T       | NA                               | NA                         | nonsense                       | R2444*            | NA             | NA                                     | chromatin remodeling and transcription coactivator | Floating Harbor Syndrome   |

\*Sanger sequencing and genotyping primer design failed for this variant



Patient 08

| Gene          | Inheritance Pattern   | Position (hg19)                      | Reference | Variant | Frequency (Exome Variant Server) | dbSNP ID (if available)    | Functional Annotation (SnPEff) | Amino Acid change | PolyPhen2      | Prediction                             | Function (UniProt)                     | Associated Diseases (OMIM)                                                                       |
|---------------|-----------------------|--------------------------------------|-----------|---------|----------------------------------|----------------------------|--------------------------------|-------------------|----------------|----------------------------------------|----------------------------------------|--------------------------------------------------------------------------------------------------|
| <i>TTN</i>    | Compound Heterozygous | Chr 2: 179611372<br>Chr 2: 179412337 | T<br>G    | C<br>A  | NA<br>NA                         | NA<br>rs184078016          | missense<br>missense           | G5252E<br>T29698I | 1.000<br>0.991 | probably damaging<br>probably damaging | component of striated muscle sarcomere | various muscular dystrophies and cardiomyopathies                                                |
| <i>COL2A1</i> | Compound Heterozygous | Chr 12: 48372421<br>Chr 12: 48378858 | G<br>C    | T<br>T  | NA<br>NA                         | rs140740708<br>NA          | missense<br>missense           | P952T<br>G585S    | 0.000<br>1.000 | benign<br>probably damaging            | type II collagen                       | various skeletal and chondrodysplasias                                                           |
| <i>ANOS</i>   | Compound Heterozygous | Chr 11: 22257752<br>Chr 11: 22283684 | G<br>G    | T<br>A  | 0.000846<br>0.000308             | rs137854523<br>rs139618850 | missense<br>missense           | G231V<br>R547Q    | 0.997<br>0.999 | probably damaging<br>probably damaging | unknown                                | Gnathodiaphyseal dysplasia; Miyoshi muscular dystrophy-3; Limb-girdle muscular dystrophy type 2L |
| <i>ZNF507</i> | Compound Heterozygous | Chr 19: 32845774<br>Chr 19:32845235  | A<br>T    | G<br>C  | NA<br>NA                         | NA<br>NA                   | missense<br>missense           | N680D<br>L500P    | 0.000<br>1.000 | benign<br>probably damaging            | unknown                                | none                                                                                             |

Patient 09

| Gene            | Inheritance Pattern   | Position (hg19)   | Reference | Variant | Frequency (Exome Variant Server) | dbSNP ID (if available) | Functional Annotation (SnpEff) | Amino Acid change | PolyPhen2 | Prediction        | Function (UniProt)                   | Associated Diseases (OMIM)          |
|-----------------|-----------------------|-------------------|-----------|---------|----------------------------------|-------------------------|--------------------------------|-------------------|-----------|-------------------|--------------------------------------|-------------------------------------|
| AFF1            | Compound Heterozygous | Chr 4: 88052985   | C         | T       | 0.000077                         | rs144598701             | missense                       | P1041S            | 0.006     | benign            |                                      |                                     |
|                 |                       | Chr 4: 88035586   | C         | T       | 0.000622                         | NA                      | missense                       | A527V             | 0.000     | benign            |                                      |                                     |
|                 |                       | Chr 4: 87968067   | C         | T       | 0.000077                         | rs150065985             | missense                       | A120V             | 1.000     | probably damaging | unknown                              | none                                |
| C10orf93 (DKFZ) | Compound Heterozygous | Chr 10: 134622020 | G         | A       | 0.000154                         | NA                      | missense                       | R846W             | 0.000     | benign            |                                      |                                     |
|                 |                       | Chr 10: 134663840 | G         | A       | NA                               | NA                      | missense                       | R115W             | 0.999     | probably damaging | unknown                              | none                                |
| FAM129C         | Compound Heterozygous | Chr 19: 17648307  | G         | A       | 0.000077                         | NA                      | missense                       | A215T             | 1.000     | probably damaging |                                      |                                     |
|                 |                       | Chr 19: 17660319  | G         | A       | NA                               | NA                      | missense                       | W609*             | NA        | NA                | unknown                              | none                                |
| LRRC14B         | Compound Heterozygous | Chr 5: 192473     | G         | C       | 0.003112                         | rs151096925             | missense                       | E274Q             | 0.100     | benign            |                                      |                                     |
|                 |                       | Chr 5: 195192     | C         | A       | 0.00032                          | NA                      | missense                       | F423L             | 0.200     | benign            | unknown                              | none                                |
| MUC5B           | Compound Heterozygous | Chr 11: 1276084   | T         | A       | NA                               | NA                      | missense                       | F5213Y            | 1.000     | probably damaging |                                      |                                     |
|                 |                       | Chr 11: 1255461   | G         | T       | NA                               | NA                      | missense                       | D802Y             | 1.000     | probably damaging |                                      |                                     |
|                 |                       | Chr 11:1263730    | G         | A       | NA                               | NA                      | missense                       | V1874M            | 0.964     | probably damaging | mucin                                | none                                |
| NOL6            | Compound Heterozygous | Chr 9: 33465808   | G         | C       | NA                               | NA                      | missense                       | L818V             | 0.009     | benign            |                                      |                                     |
|                 |                       | Chr 9: 33472070   | G         | C       | NA                               | NA                      | missense                       | R104G             | 0.802     | possibly damaging |                                      | none                                |
| ABCA13          | Autosomal Recessive   | Chr 7: 48318458   | A         | G       | NA                               | NA                      | missense                       | D2556G            | 0.399     | benign            | ATP-binding transporter              |                                     |
| OBSL1           | Autosomal Recessive   | Chr 2: 220431551  | C         | T       | NA                               | NA                      | splice site donor              | c.2134+1C>T       | NA        | NA                | cellular scaffold protein            | 3M Syndrome                         |
| OBSL1           | Autosomal Recessive   | Chr 2: 220420990  | C         | T       | 0.009044                         | rs183329050             | missense                       | R1454Q            | 1.000     | probably damaging | cellular scaffold protein            | 3M Syndrome                         |
| PKD1L1          | Autosomal Recessive   | Chr 7: 47927741   | G         | A       | NA                               | NA                      | missense                       | H895Y             | 0.993     | probably damaging | unknown                              | none                                |
| ACOT9           | X-linked recessive    | Chr X: 23754116   | T         | C       | NA                               | NA                      | missense                       | K13R              | 0.028     | benign            | lipid metabolism                     | X-linked mental retardation type 46 |
| ARHGEF6         | X-linked recessive    | Chr X: 135829739  | C         | G       | 0.000284                         | rs149768069             | missense                       | D88H              | 0.000     | benign            | Guanine nucleotide exchange factor   | none                                |
| P2RY4           | X-linked recessive    | Chr X: 48547058   | C         | T       | 0.000095                         | NA                      | missense                       | L14F              | 0.004     | benign            | G-protein coupled receptor signaling | none                                |
| WAS             | X-linked recessive    | Chr X: 69479435   | G         | A       | NA                               | NA                      | missense                       | P314L             | 0.241     | benign            | regulation of actin organization     | Wiskott Aldrich Syndrome            |

**Patient 10**

| Gene    | Inheritance Pattern      | Position (hg19)  | Reference | Variant | Frequency<br>(Exome Variant<br>Server) | dbSNP ID (if available) | Functional<br>Annotation<br>(SnPEff) | Amino Acid<br>change | PolyPhen2 | Prediction        | Function (UniProt)                                                  | Associated Diseases (OMIM)                                                                 |
|---------|--------------------------|------------------|-----------|---------|----------------------------------------|-------------------------|--------------------------------------|----------------------|-----------|-------------------|---------------------------------------------------------------------|--------------------------------------------------------------------------------------------|
| ATF6B   | Compound<br>Heterozygous | Chr 6: 32095465  | G         | A       | 0.001922                               | rs17201623              | missense                             | P52S                 | .001      | benign            | transcription factor in                                             | none                                                                                       |
|         |                          | Chr 6: 32086893  | C         | G       | NA                                     | NA                      | missense                             | R331P                | 1.000     | probably damaging | unfolded protein response                                           |                                                                                            |
| COL6A6  | Compound<br>Heterozygous | Chr 3: 130300740 | C         | T       | 0.000925                               | NA                      | nonsense                             | R1295*               | NA        | NA                | collage type 6                                                      | none                                                                                       |
|         |                          | Chr 3: 130290069 | C         | T       | 0.00327                                | rs111457392             | missense                             | R937W                | 1.000     | probably damaging | crossbridging of<br>microtubules and other<br>cytoskeletal elements |                                                                                            |
| MAP1A   | Compound<br>Heterozygous | Chr 15: 43818706 | G         | T       | NA                                     | NA                      | missense                             | D1679Y               | 0.891     | possibly damaging | bind immunoglobulins                                                | none                                                                                       |
|         |                          | Chr 15: 43819273 | C         | T       | NA                                     | NA                      | missense                             | P1868S               | 0.996     | probably damaging |                                                                     |                                                                                            |
| FCGR1B* | de novo<br>heterozygous  | Chr 1: 120930090 | T         | C       | NA                                     | NA                      | missense                             | M171V                | 0.315     | benign            |                                                                     |                                                                                            |
| BTK     | de novo<br>hemizygous    | Chr X: 100608911 | G         | A       | NA                                     | NA                      | missense                             | P566L                | 1.000     | probably damaging | tyrosine kinase needed for<br>B-cell development                    | X-linked<br>agammaglobulinemia-1;<br>Agammaglobulinemia and<br>isolated hormone deficiency |

\*Sanger sequencing and genotyping primer design failed for this variant

**Patient 11**

| Gene           | Inheritance Pattern     | Position (hg19)  | Reference | Variant | Frequency<br>(Exome Variant<br>Server) | dbSNP ID (if available) | Functional<br>Annotation<br>(SnpEff) | Amino Acid<br>change   | PolyPhen2 | Prediction        | Function (UniProt)       | Associated Diseases (OMIM) |
|----------------|-------------------------|------------------|-----------|---------|----------------------------------------|-------------------------|--------------------------------------|------------------------|-----------|-------------------|--------------------------|----------------------------|
| <i>FAM134A</i> | de novo<br>heterozygous | Chr 2: 220045422 | G         | T       | NA                                     | NA                      | missense                             | V196L                  | 0.828     | possibly damaging | unknown                  | none                       |
| <i>CUL7</i>    | Autosomal<br>recessive  | Chr 6: 43013346  | G         | GATCT   | NA                                     | NA                      | frame shift                          | c.2837_2840<br>dupAGAT | NA        | NA                | cell scaffolding protein | 3M Syndrome                |

Patient 12

| Gene           | Inheritance Pattern   | Position (hg19)                        | Reference | Variant | Frequency (Exome Variant Server) | dbSNP ID (if available)    | Functional Annotation (SnpEff) | Amino Acid change | PolyPhen2      | Prediction                             | Function (UniProt)                                            | Associated Diseases (OMIM)                                                                                          |
|----------------|-----------------------|----------------------------------------|-----------|---------|----------------------------------|----------------------------|--------------------------------|-------------------|----------------|----------------------------------------|---------------------------------------------------------------|---------------------------------------------------------------------------------------------------------------------|
| <i>ABCA12</i>  | Compound Heterozygous | Chr 2: 215876783<br>Chr 2: 215813807   | T<br>T    | C<br>C  | 0.001922<br>0.001384             | rs147218173<br>rs150196545 | missense<br>missense           | N678S<br>I2307V   | 0.000<br>0.001 | benign<br>benign                       | transporter involved in lipid homeostasis                     | Harequin Ichthyosis Type 4B; Congeintal Autosomal recessive ichthyosis type 4A                                      |
| <i>CACNA1G</i> | Compound Heterozygous | Chr 17: 48703747<br>Chr 17: 48650063   | C<br>G    | T<br>A  | NA<br>0.001741                   | NA<br>NA                   | missense<br>missense           | R2257W<br>G299S   | 0.999<br>0.001 | probably damaging<br>benign            | T-type calcium channel                                        | none                                                                                                                |
| <i>HERC2</i>   | Compound Heterozygous | Chr 15: 28412850<br>Chr 15: 28456199   | T<br>G    | C<br>A  | NA<br>NA                         | NA<br>NA                   | missense<br>missense           | M3513V<br>R2340W  | 0.000<br>1.000 | benign<br>probably damaging            | E3 ubiquitin ligase                                           | none                                                                                                                |
| <i>MSLN</i>    | Compound Heterozygous | Chr 16: 820127<br>Chr 16: 820203       | G<br>A    | A<br>C  | NA<br>NA                         | NA<br>NA                   | missense<br>missense           | A602V<br>W577G    | 0.900<br>1.000 | possibly damaging<br>probably damaging | cell adhesion                                                 | none                                                                                                                |
| <i>NBEAL2</i>  | Compound Heterozygous | Chr 3: 47038529<br>Chr 3: 47041758     | A<br>C    | G<br>T  | NA<br>NA                         | NA<br>NA                   | missense<br>missense           | D881G<br>S1390L   | 1.000<br>1.000 | probably damaging<br>probably damaging | synthesis of platelets                                        | Gray platelet syndrome                                                                                              |
| <i>OGFOD2</i>  | Compound Heterozygous | Chr 12: 123463739<br>Chr 12: 123461223 | G<br>G    | A<br>A  | 0.000157<br>0.000388             | NA<br>NA                   | missense<br>missense           | R240H<br>R11Q     | 1.000<br>1.000 | probably damaging<br>probably damaging | unknown                                                       | none                                                                                                                |
| <i>PKD1L1</i>  | Compound Heterozygous | Chr 7: 47880144<br>Chr 7: 47968953     | C<br>C    | T<br>T  | 0.005459<br>0.003767             | rs116988549<br>rs145088541 | missense<br>missense           | D1823N<br>R303Q   | 0.279<br>0.003 | benign<br>benign                       | unknown                                                       | none                                                                                                                |
| <i>PLCG2</i>   | Compound Heterozygous | Chr 16: 81957106<br>Chr 16: 81939089   | A<br>T    | G<br>C  | 0.001738<br>0.003443             | rs142825971<br>rs187956469 | missense<br>missense           | K775R<br>Y482H    | 0.121<br>0.974 | benign<br>probably damaging            | production of intracellular intracellular messenger molecules | Autoinflammation, antibody deficiency, and immune dysregulation syndrome; Familial cold autoinflammatory syndrome 3 |
| <i>NEFM</i>    | de novo heterozygous  | Chr 8: 24771390                        | C         | G       | NA                               | NA                         | missense                       | S28R              | 0.984          | probably damaging                      | unknown                                                       | none                                                                                                                |

**Patient 13**

| Gene              | Inheritance Pattern | Position (hg19)  | Reference | Variant | Frequency<br>(Exome Variant<br>Server) | dbSNP ID (if available) | Functional<br>Annotation<br>(SnpEff) | Amino Acid<br>change | PolyPhen2 | Prediction        | Function (UniProt)                  | Associated Diseases (OMIM)  |
|-------------------|---------------------|------------------|-----------|---------|----------------------------------------|-------------------------|--------------------------------------|----------------------|-----------|-------------------|-------------------------------------|-----------------------------|
| <i>CP</i>         | Compound            | Chr 3: 148917570 | G         | A       | 0.003229                               | rs35331711              | missense                             | P477L                | 1.000     | probably damaging |                                     | Cerebellar ataxia; Systemic |
|                   | Heterozygous        | Chr 3: 148899824 | G         | C       | 0.004536                               | rs56033670              | missense                             | T841R                | 0.985     | probably damaging | binds plasma copper                 | hemosiderosis               |
| <i>RALGAPA1</i>   | Compound            | Chr 14: 36192385 | G         | A       | 0.000077                               | NA                      | missense                             | S651L                | 1.000     | probably damaging |                                     |                             |
|                   | Heterozygous        | Chr 14: 36194277 | T         | C       | 0.001                                  | rs144614582             | missense                             | K607E                | 0.144     | benign            | GTPase activator                    | none                        |
| <i>AC005522.1</i> | Compound            | Chr 7: 76131649  | C         | T       | 0.000616                               | rs148587797             | missense                             | A422V                | 0.002     | benign            |                                     |                             |
|                   | Heterozygous        | Chr 7: 76126681  | T         | C       | 0.001462                               | rs150299899             | missense                             | I346T                | 0.788     | possibly damaging | regulates NOTCH signaling           | none                        |
| <i>PIK3AP1</i>    | de novo             |                  |           |         |                                        |                         |                                      |                      |           |                   | signaling adapter involved          |                             |
|                   | heterozygous        | Chr 10: 98469324 | C         | T       | NA                                     | NA                      | missense                             | D144N                | 1.000     | probably damaging | in B-cell development               | none                        |
| <i>SSX7</i>       | X-linked recessive  | Chr X: 52681967  | A         | T       | NA                                     | NA                      | missense                             | I46N                 | 0.999     | probably damaging | possible transcription<br>modulator | none                        |

**Patient 14**

| Gene       | Inheritance Pattern            | Position (hg19) | Reference | Variant | Frequency<br>(Exome Variant<br>Server) | dbSNP ID (if available) | Functional<br>Annotation<br>(SnpEff) | Amino Acid<br>change | PolyPhen2 | Predictio         | Function (UniProt) | Associated Diseases (OMIM) |
|------------|--------------------------------|-----------------|-----------|---------|----------------------------------------|-------------------------|--------------------------------------|----------------------|-----------|-------------------|--------------------|----------------------------|
| AL359075.1 | compound                       | Chr1: 177901629 | G         | C       | 0.002267                               | rs78192809              | missense                             |                      | 0.838     | possibly damaging |                    |                            |
|            | heterozygous                   | Chr1: 177917055 | A         | T       | 0.002074                               | NA                      | missense                             | P1003R               | 0.989     | probably damaging | unknown            | none                       |
| FAM111A    | <i>de novo</i><br>heterozygous | Chr11: 58920847 | G         | A       | NA                                     | NA                      | missense                             | R569H                | 0.901     | possibly damaging | unknown            | Kenny-Caffey Syndrome      |
| LRRC30     | <i>de novo</i><br>heterozygous | Chr18: 7231180  | C         | A       | NA                                     | NA                      | missense                             | P15H                 | 0.726     | possibly damaging | unknown            | none                       |
