# Supplementary material
Source: publisher figshare collection journal article supplement (https://karger.figshare.com/articles/dataset/_/5126374)
Supplement: Supplementary file 3 [file 1]

#### **Supplementary Table 4**

**Autosomal dominant variants in family P05:** Annotation is the same as in Supplementary Table 3.

**Patient 05 Dominant Analysis**

| Gene            | Inheritance Pattern | Sibling Status | Position (hg19)  | Reference | Variant | Frequency (Exome Variant Server) | dbSNP ID (if available) | Functional Annotation (SnPEff) | Amino Acid change | PolyPhen2 | Prediction        | Function (UniProt)                                     | Associated Diseases (OMIM)                          |
|-----------------|---------------------|----------------|------------------|-----------|---------|----------------------------------|-------------------------|--------------------------------|-------------------|-----------|-------------------|--------------------------------------------------------|-----------------------------------------------------|
| <i>C1orf141</i> | Autosomal D         | Unaffected     | Chr1: 67559090   | T         | G       | NA                               | NA                      | missense                       | K267N             | 0.046     | benign            | unknown                                                | none                                                |
| <i>CELSR2</i>   | Autosomal D         | Unaffected     | Chr1: 109803819  | T         | C       | NA                               | NA                      | missense                       | F1372L            | 0.998     | probably damaging | receptor for cell/cell signaling in neural development | none                                                |
| <i>ILK</i>      | Autosomal D         | Unaffected     | Chr11: 6631060   | A         | G       | NA                               | NA                      | missense                       | N321S             | 0.115     | benign            | regulates integrin-mediated signal transduction        |                                                     |
| <i>LAMB4</i>    | Autosomal D         | Unaffected     | Chr7: 107706230  | C         | T       | NA                               | NA                      | missense                       | C938Y             | 1.000     | probably damaging | laminin for extracellular interactions                 | none                                                |
| <i>GCC1</i>     | Autosomal D         | Unaffected     | Chr7: 127222636  | T         | C       | NA                               | NA                      | missense                       | K587R             | 0.001     | benign            | involved in Golgi structure                            | none                                                |
| <i>SDS</i>      | Autosomal D         | Unaffected     | Chr12: 113836398 | G         | C       | NA                               | NA                      | missense                       | A116G             | 0.004     | benign            | serine and threonine dehydratase                       | none                                                |
| <i>COX6B1</i>   | Autosomal D         | Unaffected     | Chr19: 36145529  | G         | A       | NA                               | NA                      | missense                       | E55K              | 0.143     | benign            | cytochrome C oxidase subunit                           | cytochrome c oxidase deficiency                     |
| <i>KCNJ14</i>   | Autosomal D         | Unaffected     | Chr19: 48967513  | G         | A       | NA                               | NA                      | missense                       | D264N             | 0.996     | probably damaging | potassium channel                                      | none                                                |
| <i>NYNRIN</i>   | Autosomal D         | Unaffected     | Chr14: 24877504  | G         | A       | NA                               | NA                      | missense                       | G210S             | 0.754     | possibly damaging | unknown                                                | none                                                |
| <i>IGF2R</i>    | Autosomal D         | Unaffected     | Chr6: 160489364  | C         | T       | NA                               | NA                      | missense                       | P1400L            | 0.386     | benign            | receptor for IGF2 and other cell signaling ligands     |                                                     |
| <i>TTLL11</i>   | Autosomal D         | Unaffected     | Chr9: 124855120  | C         | G       | NA                               | NA                      | missense                       | G193A             | 0.017     | benign            | modifies alpha tubulin                                 | none                                                |
| <i>TMEM45B</i>  | Autosomal D         | Unaffected     | Chr11: 129728556 | CTT       | C       | NA                               | NA                      | frame shift                    | NA                | NA        | NA                | unknown                                                | none                                                |
| <i>RELL1</i>    | Autosomal D         | Unaffected     | Chr4: 37640126   | G         | T       | NA                               | NA                      | missense                       | A129E             | 1.000     | probably damaging | unknown                                                | none                                                |
| <i>BAG3</i>     | Autosomal D         | Unaffected     | Chr10: 121436295 | CAGG      | C       | NA                               | NA                      | codon deletion                 | NA                | NA        | NA                | regulates molecular chaperones and inhibit apoptosis   | Dilated cardiomyopathy 1HH; Myofibrillar myopathy 6 |
| <i>WAC</i>      | Autosomal D         | Unaffected     | Chr10: 28878666  | C         | T       | NA                               | NA                      | missense                       | P128L             | 0.000     | benign            | regulates transcription and RNA processing             | none                                                |
| <i>ENAM</i>     | Autosomal D         | Unaffected     | Chr4: 71507984   | A         | T       | NA                               | NA                      | missense                       | N281Y             | 0.967     | probably damaging | formation of tooth enamel                              | Amelogenesis imperfecta type IB and IC              |
| <i>TRIM14</i>   | Autosomal D         | Unaffected     | Chr9: 100850210  | A         | T       | NA                               | NA                      | missense                       | C291S             | 0.801     | possibly damaging | unknown                                                | none                                                |
| <i>CGB1</i>     | Autosomal D         | Unaffected     | Chr19: 49539490  | C         | A       | NA                               | NA                      | missense                       | C27F              | 1.000     | probably damaging | chorionic gonadotropin subunit                         | none                                                |

|                 |                    |            |                  |    |   |    |    |             |        |       |                   |                                            |                                   |
|-----------------|--------------------|------------|------------------|----|---|----|----|-------------|--------|-------|-------------------|--------------------------------------------|-----------------------------------|
| <i>RBBP8</i>    | Autosomal D        | Unaffected | Chr18: 20548820  | GA | G | NA | NA | frame shift | NA     | NA    | NA                | DNA repair pathways                        | Seckel syndrome 2; Jawad Syndrome |
| <i>ZAN</i>      | Autosomal D        | Unaffected | Chr7: 100389666  | G  | A | NA | NA | missense    | P2536L | 0.926 | probably damaging | sperm protein for binding to egg           | none                              |
| <i>CCDC15</i>   | Autosomal D        | Unaffected | Chr11: 124829751 | C  | T | NA | NA | missense    | T123I  | 0.001 | benign            | unknown                                    | none                              |
| <i>SUPT5H</i>   | Autosomal D        | Unaffected | Chr19: 39944011  | C  | T | NA | NA | missense    | R31W   | 0.830 | possibly damaging | regulates transcription and RNA processing | none                              |
| <i>TMED6</i>    | Autosomal D        | Unaffected | Chr16: 69383523  | C  | T | NA | NA | missense    | R82Q   | 0.998 | probably damaging | unknown                                    | none                              |
| <i>MOGAT2</i>   | Autosomal D        | Unaffected | Chr11: 75428946  | G  | A | NA | NA | missense    | A5T    | 0.999 | probably damaging | fatty acid metabolism                      | none                              |
| <i>GPR6</i>     | Autosomal D        | Unaffected | Chr6: 110300437  | C  | T | NA | NA | missense    | A41V   | 0.147 | benign            | G-protein coupled receptor                 | none                              |
| <i>NLRP4</i>    | Autosomal D        | Unaffected | Chr19: 56390314  | G  | T | NA | NA | missense    | A951S  | 0.085 | benign            | regulates inflammatory pathways            | none                              |
| <i>KIAA1432</i> | Autosomal D        | Unaffected | Chr9: 5774209    | C  | G | NA | NA | missense    | P1412R | 0.077 | benign            | unknown                                    | none                              |
| <i>LRRC61</i>   | Autosomal D        | Unaffected | Chr7: 150034315  | C  | T | NA | NA | missense    | P122L  | 0.014 | benign            | unknown                                    | none                              |
| <i>NEMF</i>     | Autosomal dominant | Affected   | Chr 14: 50253447 | G  | C | NA | NA | missense    | Q973E  | 0.425 | benign            | nuclear export                             | none                              |
| <i>PAX8</i>     | Autosomal dominant | Affected   | Chr 2: 113977674 | A  | G | NA | NA | missense    | L424S  | 0.992 | probably damaging | thyroid transcription factor               | Congenital hypothyroidism         |
| <i>MPP2</i>     | Autosomal dominant | Affected   | Chr 17: 41960344 | G  | A | NA | NA | missense    | T172I  | 0.173 | benign            | unknown                                    | none                              |
| <i>GTF3C2</i>   | Autosomal dominant | Affected   | Chr 2: 27552024  | T  | C | NA | NA | missense    | N668S  | 0.002 | benign            | transcription complex component            | none                              |
| <i>HECW2</i>    | Autosomal dominant | Affected   | Chr 2: 197187284 | C  | A | NA | NA | missense    | A268S  | 0.414 | benign            | E3 ubiquitin ligase                        | none                              |
| <i>FAM83F</i>   | Autosomal dominant | Affected   | Chr 22: 40417371 | C  | T | NA | NA | missense    | T286M  | 0.950 | possibly damaging | unknown                                    | none                              |
| <i>RNF40</i>    | Autosomal dominant | Affected   | Chr 16: 30780841 | C  | T | NA | NA | nonsense    | R836*  | NA    | NA                | E3 ubiquitin ligase complex component      | none                              |
| <i>UGP2</i>     | Autosomal dominant | Affected   | Chr 2: 64118276  | A  | C | NA | NA | missense    | N481T  | 0.998 | probably damaging | glucosyl donor                             | none                              |
| <i>ZWILCH</i>   | Autosomal dominant | Affected   | Chr 15: 66811324 | C  | T | NA | NA | missense    | S143L  | 0.978 | probably damaging | component of mitotic checkpoint            | none                              |
| <i>TTC3</i>     | Autosomal dominant | Affected   | Chr 21: 38568067 | T  | A | NA | NA | missense    | L1770H | 0.681 | possibly damaging | E3 ubiquitin ligase complex component      | none                              |
| <i>ZNF710</i>   | Autosomal dominant | Affected   | Chr 15: 90622959 | C  | G | NA | NA | missense    | F631L  | 0.038 | benign            | possible role in transcription regulation  | none                              |

|               |                    |          |                   |    |   |    |    |             |               |       |                   |                                                                    |                                                                                                                                                                                     |
|---------------|--------------------|----------|-------------------|----|---|----|----|-------------|---------------|-------|-------------------|--------------------------------------------------------------------|-------------------------------------------------------------------------------------------------------------------------------------------------------------------------------------|
| <i>A2ML1</i>  | Autosomal dominant | Affected | Chr 12: 8975800   | G  | C | NA | NA | missense    | A29P          | 1.000 | probably damaging | proteinase inhibitor                                               | none                                                                                                                                                                                |
| <i>VPS13C</i> | Autosomal dominant | Affected | Chr 15: 62253984  | G  | A | NA | NA | missense    | R1238C        | 1.000 | probably damaging | unknown                                                            | none                                                                                                                                                                                |
| <i>ELF5</i>   | Autosomal dominant | Affected | Chr 11: 34501833  | G  | A | NA | NA | missense    | R244W         | 1.000 | probably damaging | transcription factor in keratinocyte differentiation               | none                                                                                                                                                                                |
| <i>IRF6</i>   | Autosomal dominant | Affected | Chr 1: 209961848  | G  | A | NA | NA | missense    | R441C         | 0.134 | benign            | transcription factor in epidermal development                      | Popliteal pterygium syndrome 1; van der Woude syndrome                                                                                                                              |
| <i>XPOT</i>   | Autosomal dominant | Affected | Chr 12: 64823883  | A  | G | NA | NA | missense    | T598A         | 0.001 | benign            | nuclear export                                                     | none                                                                                                                                                                                |
| <i>DCTN2</i>  | Autosomal dominant | Affected | Chr 12: 57926769  | T  | C | NA | NA | missense    | M258V         | 0.010 | benign            | chromosome alignment and microtubule alignment                     | none                                                                                                                                                                                |
| <i>LAMA1</i>  | Autosomal dominant | Affected | Chr 18: 7009319   | C  | T | NA | NA | missense    | R1307Q        | 0.997 | probably damaging | laminin in extracellular matrix                                    | none                                                                                                                                                                                |
| <i>COLQ</i>   | Autosomal dominant | Affected | Chr 3: 15498067   | TG | T | NA | NA | frame shift | c.872_873insG | NA    | NA                | anchors acetylcholinesterase                                       | Endplate acetylcholinesterase deficiency                                                                                                                                            |
| <i>ABHD15</i> | Autosomal dominant | Affected | Chr 17: 27893425  | T  | C | NA | NA | missense    | Y187C         | 0.004 | benign            | unknown                                                            | none                                                                                                                                                                                |
| <i>WDR6</i>   | Autosomal dominant | Affected | Chr 3: 49050602   | T  | G | NA | NA | missense    | S545R         | 0.119 | benign            | cell growth suppression                                            | none                                                                                                                                                                                |
| <i>LUZP2</i>  | Autosomal dominant | Affected | Chr 11: 24753719  | T  | C | NA | NA | missense    | L79S          | 0.980 | probably damaging | unknown                                                            | none                                                                                                                                                                                |
| <i>PLEC</i>   | Autosomal dominant | Affected | Chr 8: 144996248  | G  | A | NA | NA | missense    | R2718W        | 0.740 | possibly damaging | helps anchor various cytoskeletal elements                         | Epidermolysis bullosa simplex with pyloric atresia; Epidermolysis bullosa simplex, Ogna type; Muscular dystrophy with epidermolysis bullosa simplex; Limb-girdle muscular dystrophy |
| <i>RIMS2</i>  | Autosomal dominant | Affected | Chr 8: 104897819  | C  | T | NA | NA | missense    | S331L         | 0.000 | benign            | unknown                                                            | none                                                                                                                                                                                |
| <i>GAS6</i>   | Autosomal dominant | Affected | Chr 13: 114531579 | A  | G | NA | NA | missense    | Y417H         | 0.130 | benign            | tyrosine kinase receptor ligand involved in various cell processes | none                                                                                                                                                                                |

|               |                    |          |                  |   |         |    |    |                                  |                           |       |                   |                                                         |                                                    |
|---------------|--------------------|----------|------------------|---|---------|----|----|----------------------------------|---------------------------|-------|-------------------|---------------------------------------------------------|----------------------------------------------------|
| <i>POU6F2</i> | Autosomal dominant | Affected | Chr 7: 39503980  | G | C       | NA | NA | missense                         | A591P                     | 0.993 | probably damaging | transcription factor involved in neuron differentiation | none                                               |
| <i>KRAS</i>   | Autosomal dominant | Affected | Chr 12: 25368389 | A | AT      | NA | NA | frame shift                      | NM_033360.2:c.556_557insT | NA    | NA                | GTPase                                                  | Cardiofaciocutaneous syndrome 2; Noonan syndrome 3 |
| <i>KIF14</i>  | Autosomal dominant | Affected | Chr 1: 200558395 | T | TTTCCTG | NA | NA | codon change and codon insertion | c.3064_3065insTTCC TG     | NA    | NA                | involved in cell division                               | none                                               |
| <i>UQCRC1</i> | Autosomal dominant | Affected | Chr 3: 48638129  | C | T       | NA | NA | missense                         | V371I                     | 0.001 | benign            | component of mitochondrial respiratory chain            | none                                               |
