# Supplementary material
Source: publisher figshare collection journal article supplement (https://karger.figshare.com/articles/dataset/_/5126374)
Supplement: Supplementary file 4 [file 1]

### Supplementary Table 3

**Autosomal dominant variants in family P04:** The table lists all variants that passed filters as described in Methods and demonstrated an autosomal dominant mode of inheritance. A sibling status of “Affected” indicates that the heterozygous variant is shared by the father, patient, and sibling. A sibling status of “Unaffected” indicates that the heterozygous variant is shared by the father and patient only. All other annotations are the same as Supplementary Table 2.

# Patient 04 Dominant Analysis

| Gene               | Inheritance Pattern | Sibling Status | Position (hg19)   | Reference | Variant | Frequency (Exome Variant Server) | dbSNP ID (if available) | Functional Annotation (SnpEff) | Amino Acid change | PolyPhen2 | Prediction        | Function (UniProt)                                             | Associated Diseases (OMIM)                |
|--------------------|---------------------|----------------|-------------------|-----------|---------|----------------------------------|-------------------------|--------------------------------|-------------------|-----------|-------------------|----------------------------------------------------------------|-------------------------------------------|
| <i>CPXM2</i>       | Autosomal dominant  | Unaffected     | Chr 10: 125506395 | C         | T       | NA                               | NA                      | missense                       | S719N             | 0.006     | benign            | unknown                                                        | none                                      |
| <i>MLL3</i>        | Autosomal dominant  | Unaffected     | Chr 7: 151878026  | T         | C       | NA                               | NA                      | missense                       | R2307G            | 0.262     | benign            | unknown                                                        | none                                      |
| <i>RALGPS1</i>     | Autosomal dominant  | Unaffected     | Chr 9: 129812366  | A         | T       | NA                               | NA                      | missense                       | L115F             | 1.000     | probably damaging | guanine nucleotide exchange factor                             | none                                      |
| <i>PLEKHG1</i>     | Autosomal dominant  | Unaffected     | Chr 6: 151161760  | C         | T       | NA                               | NA                      | missense                       | H1296Y            | 0.229     | benign            | unknown                                                        | none                                      |
| <i>HIST1H1A</i>    | Autosomal dominant  | Unaffected     | Chr 6: 26017679   | T         | TCC     | NA                               | NA                      | frame shift                    | c.282_283insCC    | NA        | NA                | histone protein                                                | none                                      |
| <i>DBF4B</i>       | Autosomal dominant  | Unaffected     | Chr 17: 42828020  | T         | C       | NA                               | NA                      | missense                       | M416T             | 0.000     | benign            | role in DNA replication and cell proliferation                 | none                                      |
| <i>BAIAP2L2</i>    | Autosomal dominant  | Unaffected     | Chr 22: 38484752  | C         | CA      | NA                               | NA                      | splice site                    | c.1118+3_4insA    | NA        | NA                | cell membrane formation                                        | none                                      |
| <i>GTPBP1</i>      | Autosomal dominant  | Unaffected     | Chr 22: 39112035  | G         | A       | NA                               | NA                      | missense                       | R143H             | 0.115     | benign            | mRNA degradation                                               | none                                      |
| <i>ATP11B</i>      | Autosomal dominant  | Unaffected     | Chr 3: 182559873  | C         | G       | NA                               | NA                      | missense                       | R223G             | 1.000     | probably damaging | P-type ATPase ion transporter                                  | none                                      |
| <i>GLS2</i>        | Autosomal dominant  | Unaffected     | Chr 12: 56868396  | C         | G       | NA                               | NA                      | missense                       | V386L             | 0.994     | probably damaging | unknown                                                        | none                                      |
| <i>THOC3</i>       | Autosomal dominant  | Unaffected     | Chr 5: 175395149  | C         | T       | NA                               | NA                      | missense                       | M21I              | 0.001     | benign            | functions in mRNA transport                                    | none                                      |
| <i>WNT9B</i>       | Autosomal dominant  | Unaffected     | Chr 17: 44952729  | C         | G       | NA                               | NA                      | missense                       | I199M             | 0.689     | possibly damaging | signaling molecule in tissue development                       | none                                      |
| <i>PDE3A</i>       | Autosomal dominant  | Unaffected     | Chr 12: 20766482  | T         | A       | NA                               | NA                      | missense                       | S373T             | 0.671     | possibly damaging | phosphodiesterase                                              | none                                      |
| <i>OSMR</i>        | Autosomal dominant  | Unaffected     | Chr 5: 38876314   | C         | T       | NA                               | NA                      | missense                       | R29C              | 0.876     | possibly damaging | component of IL31 receptor, activates downstream STAT proteins | Primary localized cutaneous amyloidosis 1 |
| <i>KIAA0141</i>    | Autosomal dominant  | Unaffected     | Chr 5: 141314152  | G         | A       | NA                               | NA                      | splice site                    | c.1149+1G>A       | NA        | NA                | unknown                                                        | none                                      |
| <i>KAT6A (MYS)</i> | Autosomal dominant  | Unaffected     | Chr 8: 41800361   | C         | T       | NA                               | NA                      | missense                       | E796K             | 0.181     | benign            | histone acetyltransferase                                      | none                                      |

|               |                    |            |                   |      |      |    |    |                 |                  |       |                   |                                           |                                                                                                            |
|---------------|--------------------|------------|-------------------|------|------|----|----|-----------------|------------------|-------|-------------------|-------------------------------------------|------------------------------------------------------------------------------------------------------------|
| <i>MYPN</i>   | Autosomal dominant | Unaffected | Chr 10: 69905256  | G    | A    | NA | NA | missense        | G368D            | 0.993 | probably damaging | sarcomere component                       | Dilated cardiomyopathy 1KK, familial restrictive cardiomyopathy 4, familial hypertrophic cardiomyopathy 22 |
| <i>LMTK2</i>  | Autosomal dominant | Affected   | Chr 7: 97822515   | G    | C    | NA | NA | missense        | S913T            | 0.094 | benign            | kinase                                    | none                                                                                                       |
| <i>DTWD1</i>  | Autosomal dominant | Affected   | Chr 15: 49917564  | TCTA | T    | NA | NA | codon deletion  | c.201_203 delCTA | NA    | NA                | unknown                                   | none                                                                                                       |
| <i>FUT2</i>   | Autosomal dominant | Affected   | Chr 19: 49206910  | C    | T    | NA | NA | missense        | R233C            | 0.403 | benign            | fucosyltransferase                        | none                                                                                                       |
| <i>TTC31</i>  | Autosomal dominant | Affected   | Chr 2: 74710253   | A    | T    | NA | NA | missense        | I11F             | 0.917 | possibly damaging | unknown                                   | none                                                                                                       |
| <i>DLL4</i>   | Autosomal dominant | Affected   | Chr 15: 41227163  | C    | T    | NA | NA | missense        | T363I            | 0.001 | benign            | angiogenesis                              | none                                                                                                       |
| <i>WDR53</i>  | Autosomal dominant | Affected   | Chr 3: 196288144  | T    | C    | NA | NA | missense        | Y68C             | 0.998 | probably damaging | unknown                                   | none                                                                                                       |
| <i>FLRT2</i>  | Autosomal dominant | Affected   | Chr 14: 86087932  | G    | A    | NA | NA | missense        | G25E             | 0.965 | probably damaging | cell adhesion and receptor signaling      | none                                                                                                       |
| <i>NPR2</i>   | Autosomal dominant | Affected   | Chr 9: 35800429   | G    | T    | NA | NA | missense        | E389D            | 0.000 | benign            | natriuretic peptide receptor              | Maroteaux type acromesomelic dysplasia                                                                     |
| <i>CC2D1A</i> | Autosomal dominant | Affected   | Chr 19: 14037355  | G    | A    | NA | NA | missense        | D656N            | 0.120 | benign            | neuronal transcription factor             | Autosomal recessive mental retardation 3                                                                   |
| <i>BAZ2B</i>  | Autosomal dominant | Affected   | Chr 2: 160194190  | C    | T    | NA | NA | missense        | E1850K           | 0.366 | benign            | transcriptional regulation                | none                                                                                                       |
| <i>RFC5</i>   | Autosomal dominant | Affected   | Chr 12: 118469082 | A    | AGAT | NA | NA | codon insertion | c.959_960insGAT  | NA    | NA                | DNA replication factor                    | none                                                                                                       |
| <i>LYPLA2</i> | Autosomal dominant | Affected   | Chr 1: 24121184   | G    | A    | NA | NA | missense        | V220M            | 0.795 | possibly damaging | hydrolyze fatty acid moieties             | none                                                                                                       |
| <i>SGTA</i>   | Autosomal dominant | Affected   | Chr 19: 2767667   | C    | T    | NA | NA | missense        | E40K             | 0.998 | probably damaging | protein chaperone                         | none                                                                                                       |
| <i>ZNF774</i> | Autosomal dominant | Affected   | Chr 15: 90903968  | A    | G    | NA | NA | missense        | Q302R            | 0.014 | benign            | possible role in transcription regulation | none                                                                                                       |
| <i>MUC16</i>  | Autosomal dominant | Affected   | Chr 19: 9073879   | C    | T    | NA | NA | missense        | A4523T           | 0.001 | benign            | mucin                                     | none                                                                                                       |
| <i>NR2F6</i>  | Autosomal dominant | Affected   | Chr 19: 17356004  | C    | A    | NA | NA | missense        | G9V              | 0.082 | benign            | transcription repression                  | none                                                                                                       |
| <i>DHX33</i>  | Autosomal dominant | Affected   | Chr 17: 5359481   | T    | C    | NA | NA | missense        | I291V            | 0.518 | possibly damaging | transcription of rRNA                     | none                                                                                                       |
| <i>MUC16</i>  | Autosomal dominant | Affected   | Chr 19: 9072538   | C    | A    | NA | NA | missense        | A4970S           | 0.087 | benign            | mucin                                     | none                                                                                                       |

|                 |                    |          |                   |   |   |    |            |          |        |       |                   |                                                          |                        |
|-----------------|--------------------|----------|-------------------|---|---|----|------------|----------|--------|-------|-------------------|----------------------------------------------------------|------------------------|
| <i>SERINC2</i>  | Autosomal dominant | Affected | Chr 1: 31906004   | G | A | NA | NA         | missense | V403I  | 0.002 | benign            | unknown                                                  | none                   |
| <i>PAH</i>      | Autosomal dominant | Affected | Chr 12: 103249019 | G | A | NA | rs62517205 | missense | H201Y  | 0.943 | possibly damaging | phenylalanine hydroxylase                                | phenylketonuria        |
| <i>MYH10</i>    | Autosomal dominant | Affected | Chr 17: 8424573   | G | C | NA | NA         | missense | T632S  | 0.001 | benign            | myosin heavy chain                                       | none                   |
| <i>AFAP1L1</i>  | Autosomal dominant | Affected | Chr 5: 148699238  | G | A | NA | NA         | missense | V525M  | 1.000 | probably damaging | cell projection formation                                | none                   |
| <i>PIGS</i>     | Autosomal dominant | Affected | Chr 17: 26881275  | G | C | NA | NA         | missense | T544S  | 0.000 | benign            | transfer of phosphatidylinositol-glycan membrane anchors | none                   |
| <i>AP2A1</i>    | Autosomal dominant | Affected | Chr 19: 50298969  | G | A | NA | NA         | missense | R263Q  | 1.000 | probably damaging | vesicle transport                                        | none                   |
| <i>FCGBP</i>    | Autosomal dominant | Affected | Chr 19: 40364055  | G | A | NA | NA         | missense | H4863Y | 0.987 | probably damaging | maintenance of mucosa                                    | none                   |
| <i>HTR6</i>     | Autosomal dominant | Affected | Chr 1: 20005569   | G | A | NA | NA         | missense | R344H  | 0.000 | benign            | serotonin receptor                                       | none                   |
| <i>KIR2DL1</i>  | Autosomal dominant | Affected | Chr 19: 55285012  | T | G | NA | NA         | missense | C100G  | 1.000 | probably damaging | unknown                                                  | none                   |
| <i>HS3ST3A1</i> | Autosomal dominant | Affected | Chr 17: 13503872  | T | C | NA | NA         | missense | Y192C  | 1.000 | probably damaging | heparan sulfate sulfotransferase                         | none                   |
| <i>CERKL</i>    | Autosomal dominant | Affected | Chr 2: 182521519  | G | A | NA | NA         | missense | P72L   | 0.197 | benign            | regulation of apoptosis                                  | none                   |
| <i>RAI1</i>     | Autosomal dominant | Affected | Chr 17: 17698661  | G | A | NA | NA         | missense | G800E  | 0.22  | benign            | transcriptional regulator                                | Smith-magenis syndrome |
